# Supplementary material
Source: PubMed Central journal article supplement (PMC3633721)

# Supplemental Fig. 3

## A

| Transcript ID(Array Design) | 24p3 <sup>-/-</sup> /wt | Sequence                  | Alignments                 | Sequence Length |
|-----------------------------|-------------------------|---------------------------|----------------------------|-----------------|
| <b>mmu-mir-362</b>          | 3.39                    | AACACACCUGUUCAAGGAUUCA    | X:6819108-6819172 (-)      | 22              |
| mmu-mir-31                  | 3.04                    | UGCUAUGCCAACAUAUUGCCAUC   | 4:88556461-88556566 (-)    | 23              |
| mmu-mir-1958                | 2.13                    | UAGGAAAGUGGAAGCAGUAAGU    | 4:48225991-48226087 (-)    | 22              |
| mmu-mir-1936                | 2.04                    | UAACUGACCUGCUGUGAACUGGC   | 12:103923138-103923230 (-) | 23              |
| mmu-mir-363                 | 1.88                    | AAUUGCACGGUAUCCAUCUGUA    | X:50094870-50094944 (-)    | 22              |
| mmu-mir-423                 | 1.65                    | UGAGGGGCAGAGAGCGAGACUUU   | 11:78891566-78891674 (-)   | 23              |
| mmu-mir-483                 | 1.72                    | AAGACGGGAGAAGAGAAGGGAG    | 7:149840829-149840901 (-)  | 22              |
| mmu-mir-18a                 | 0.58                    | ACUGCCCUAAGUGCUCCUUCUG    | 14:115443073-115443168 (+) | 22              |
| mmu-mir-878                 | 0.54                    | GCAUGACACCACACUGGGUAGA    | X:64054683-64054760 (-)    | 22              |
| mmu-mir-1903                | 0.45                    | CCUUCUUCUUCUUCUGAGACA     | 8:130883141-130883220 (+)  | 22              |
| mmu-mir-1966                | 0.43                    | AAGGGAGCUGGCUCAGGAGAGAGUC | 8:108139366-108139473 (+)  | 25              |
| mmu-mir-669b                | 0.49                    | AGUUUUGUGUGCAUGUGCAUGU    | 2:10389417-10389513 (+)    | 22              |
| mmu-mir-335                 | 0.58                    | UUUUUCAUUAUUGCUCCUGACC    | 6:30691299-30691396 (+)    | 22              |
| mmu-mir-654                 | 0.36                    | UAUGUCUGCUGACCAUCACCUU    | 12:110961428-110961511 (+) | 22              |

## B

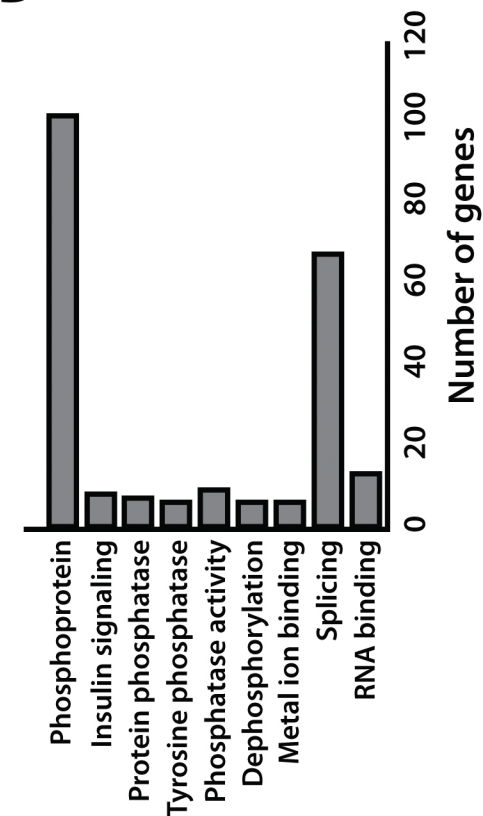

## C

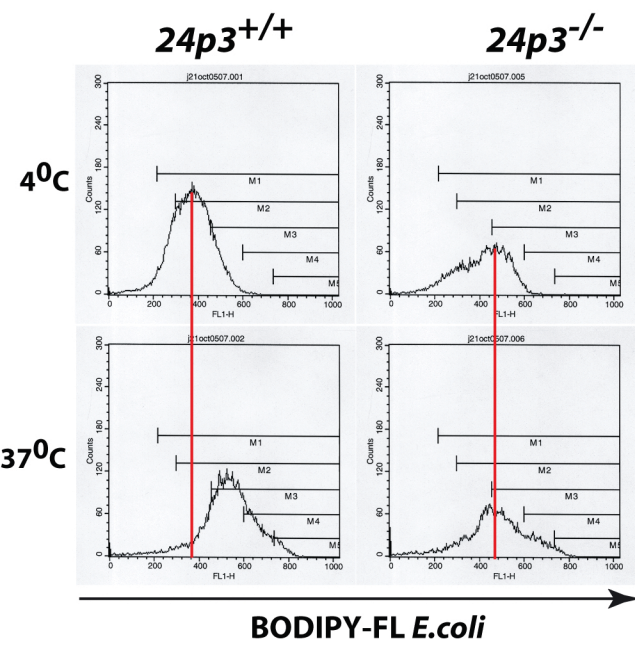

## D

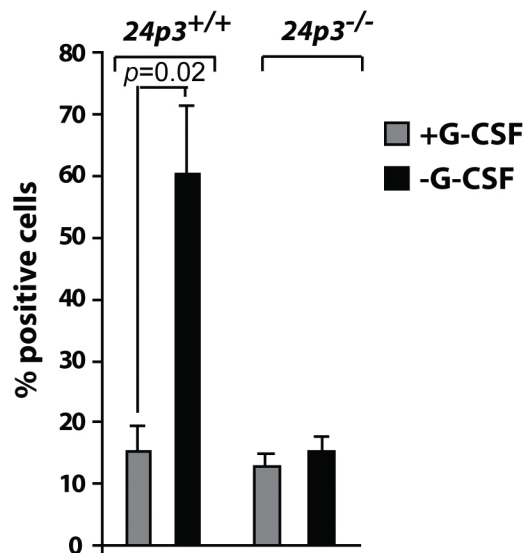

Supplement: NIHMS453980-supplement-4.pdf [file NIHMS453980-supplement-4.pdf]
