# Supplementary material
Source: PubMed Central journal article supplement (PMC3633721)

# Supplemental Fig. 1

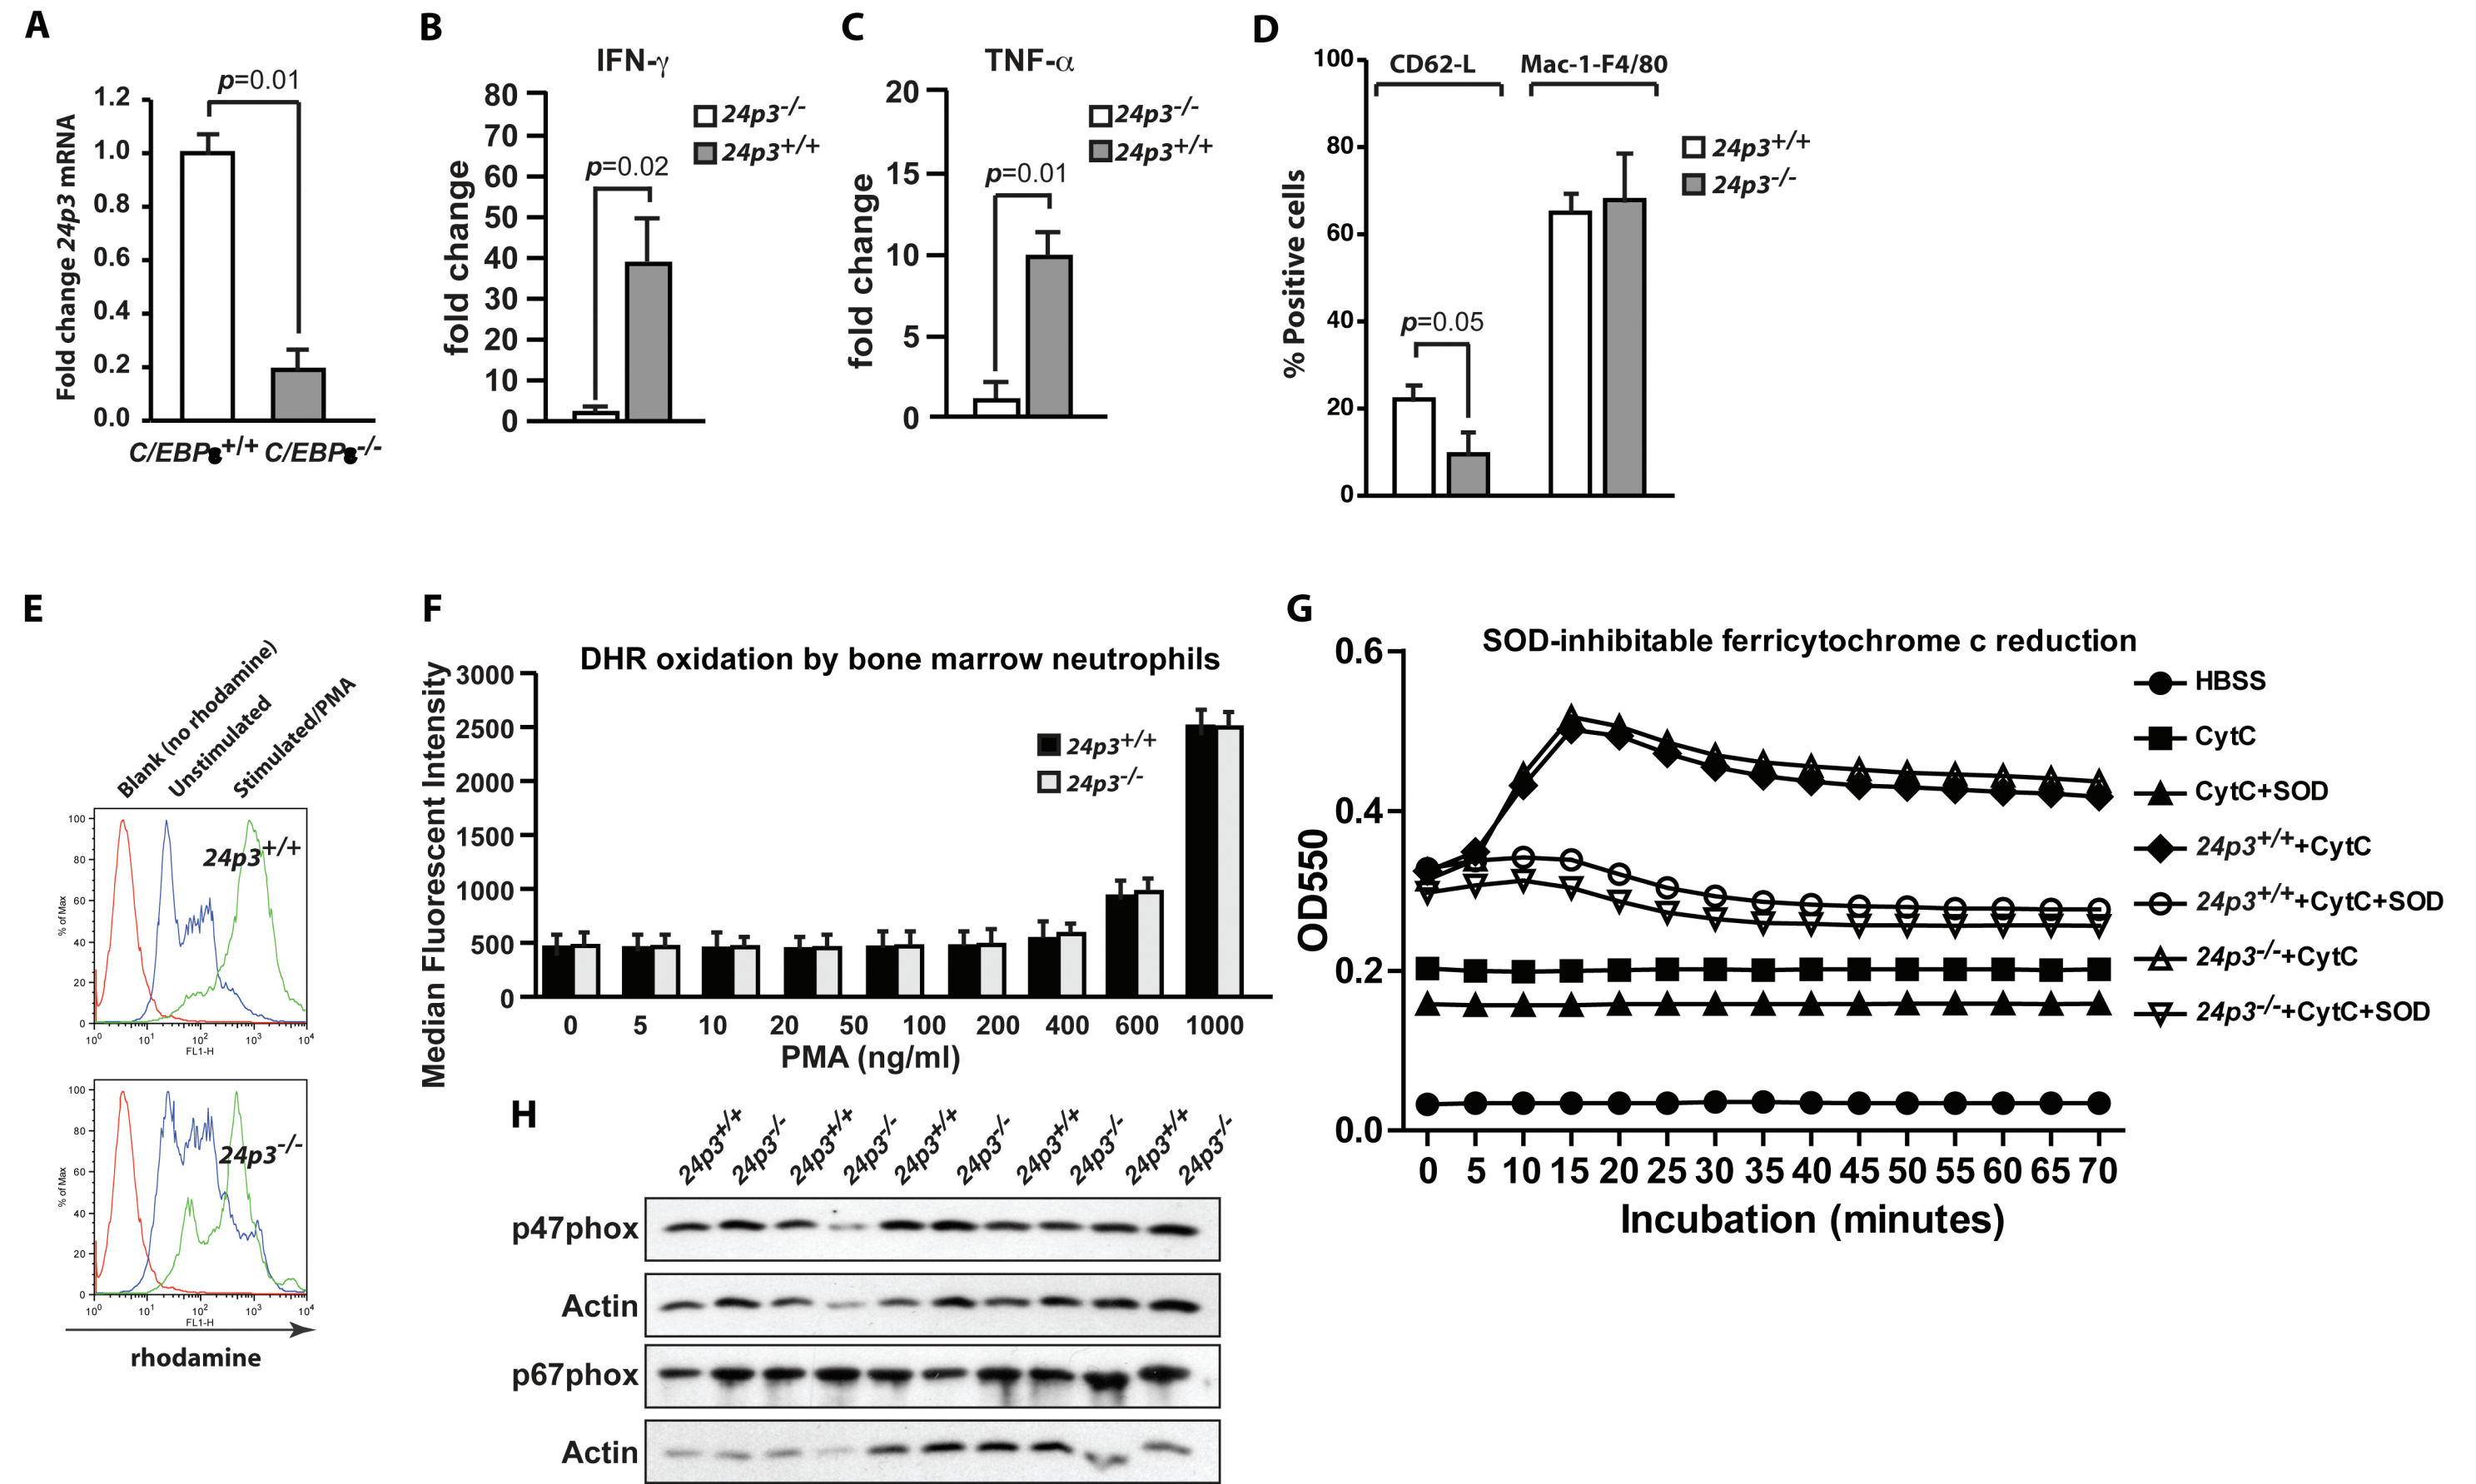

Supplement: NIHMS453980-supplement-2.pdf [file NIHMS453980-supplement-2.pdf]

# Supplemental Fig. 2

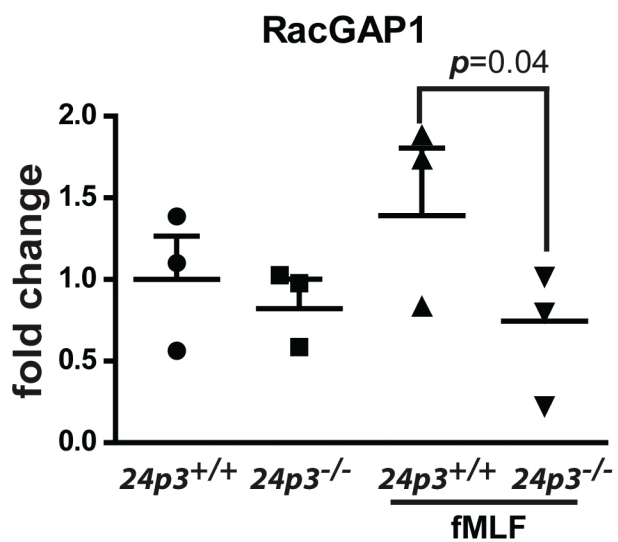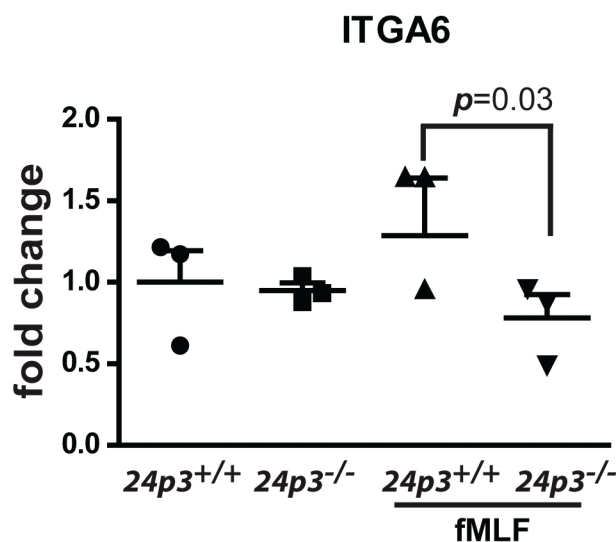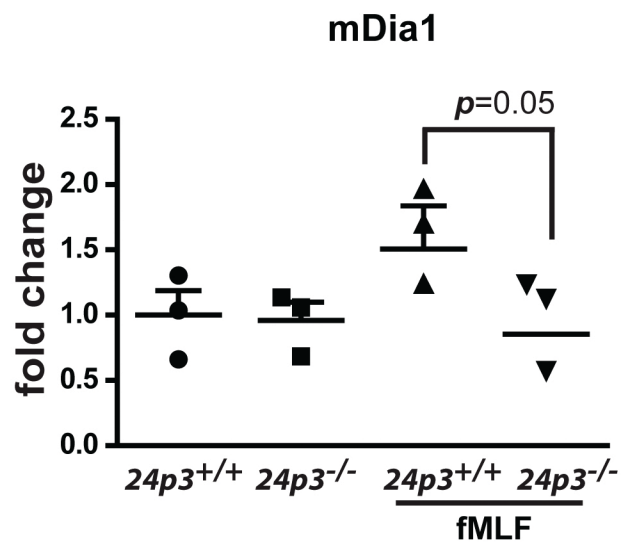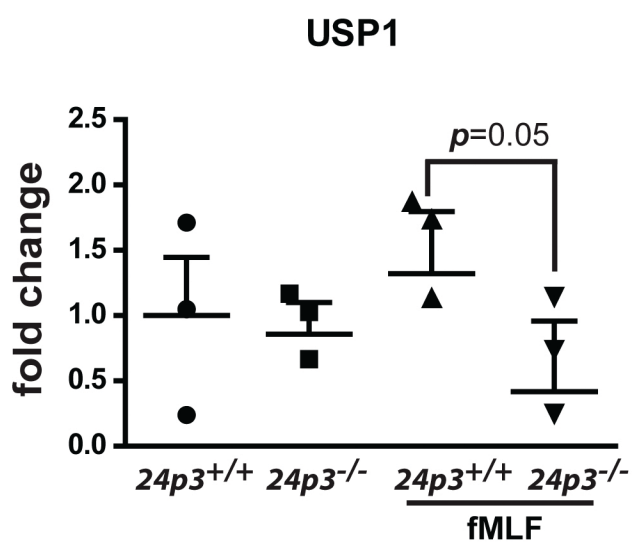

Supplement: NIHMS453980-supplement-3.pdf [file NIHMS453980-supplement-3.pdf]

# Supplemental Fig. 4

## A

### Peripheral Blood

*24p3<sup>+/+</sup>*

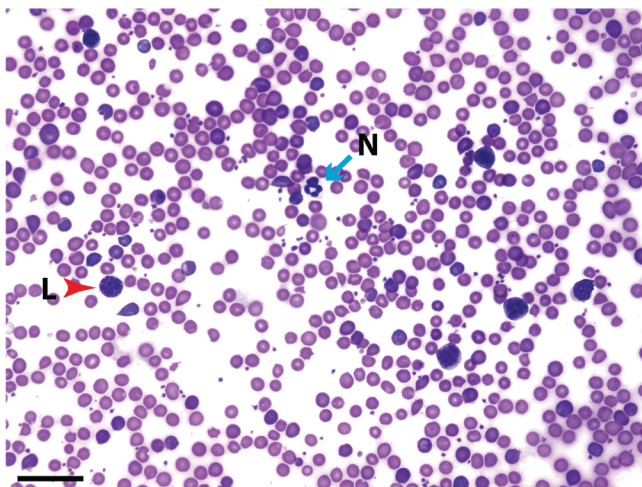

*24p3<sup>-/-</sup>*

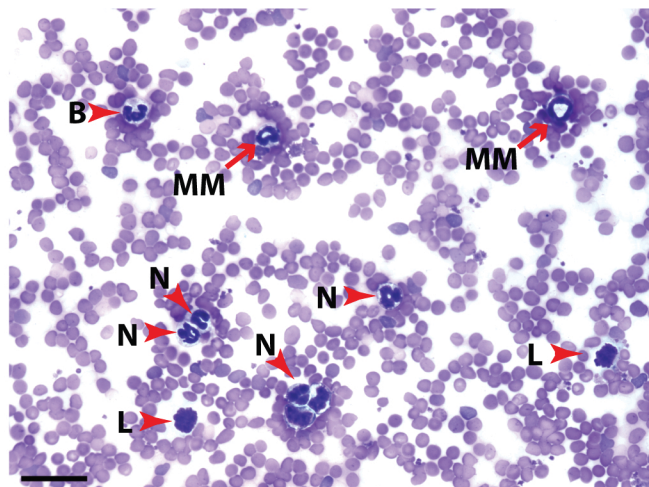

## B

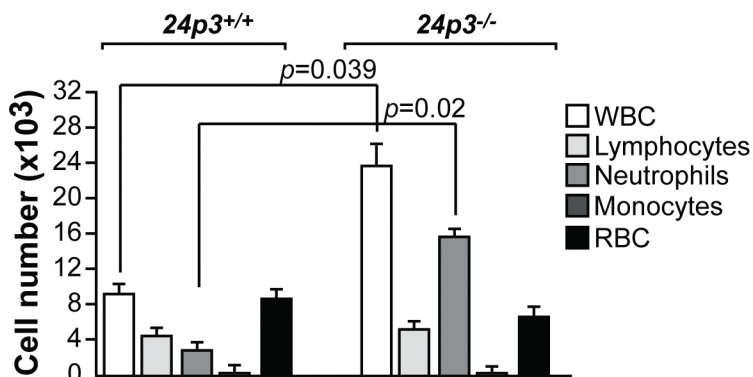

Supplement: NIHMS453980-supplement-5.pdf [file NIHMS453980-supplement-5.pdf]
